# Supplementary material for: Preferential targeting of cancer stem cells in the radiosensitizing effect of ABT-737 on HNSCC
Source: PubMed Central journal article supplement (PMC4941347; doi:10.18632/oncotarget.7744), 2016-02-26
Supplement: oncotarget-07-16731-s001.pdf [file oncotarget-07-16731-s001.pdf]

## Preferential targeting of cancer stem cells in the radiosensitizing effect of ABT-737 on HNSCC

### Supplementary Materials

#### Supplementary Data S1: Isobolographic analyze on the SQ20B cell line

| Irradiation dose (Gy) | Isobolographic analyze |              |
|-----------------------|------------------------|--------------|
|                       | Survival 10%           | Survival 50% |
| 1                     | Additive               | Additive     |
| 2                     | Synergistic            | Synergistic  |
| 3                     | Synergistic            | Synergistic  |
| 4                     | Synergistic            | Synergistic  |
| 5                     | Synergistic            | Synergistic  |

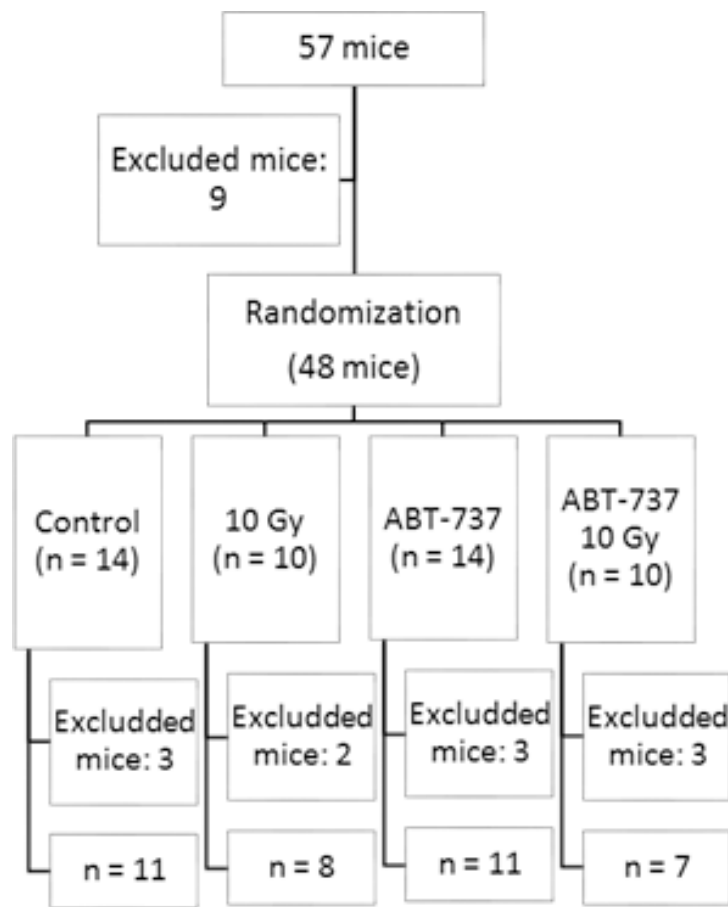

**Supplementary Data S2: Randomization diagram.** Before the randomization, 9 mice were excluded because of their low tumoral volume ( $< 60 \text{ cm}^3$ ). The randomization and treatments were realized on 48 mice. After treatment, some mice were excluded for different reasons (important edema that modified the tumoral volume measurement, necrosis of tumor, tumoral volume  $> 400 \text{ cm}^3$  at the first day after treatment).
